# Supplementary material for: Extracellular IL-33 cytokine, but not endogenous nuclear IL-33, regulates protein expression in endothelial cells
Source: PubMed Central journal article supplement (PMC5046127; doi:10.1038/srep34255), 2016-10-03

**Supplementary Information**

**Extracellular IL-33 cytokine, but not endogenous nuclear IL-33, regulates protein expression in endothelial cells**

**Violette Gautier<sup>1</sup>, Corinne Cayrol<sup>1</sup>, Dorian Farache<sup>1</sup>, Stéphane Roga<sup>1</sup>, Bernard Monsarrat<sup>1</sup>, Odile Burlet-Schiltz<sup>1</sup>, Anne Gonzalez de Peredo<sup>1</sup> and Jean-Philippe Girard<sup>1,\*</sup>**

<sup>1</sup>Institut de Pharmacologie et de Biologie Structurale, Université de Toulouse, CNRS, UPS, Toulouse, France

**Supplementary Figure 1:** Multi scatter plot of MS data showing repeatability between replicate experiments (denoted A, B and C for each condition) and global proteome stability between biological conditions (Control, I133 stimulation 6h, I133 stimulation 24h). All LFQ intensity values for each protein were plotted after log2 transformation. Pearson correlation coefficients are indicated for each pairwise comparison.

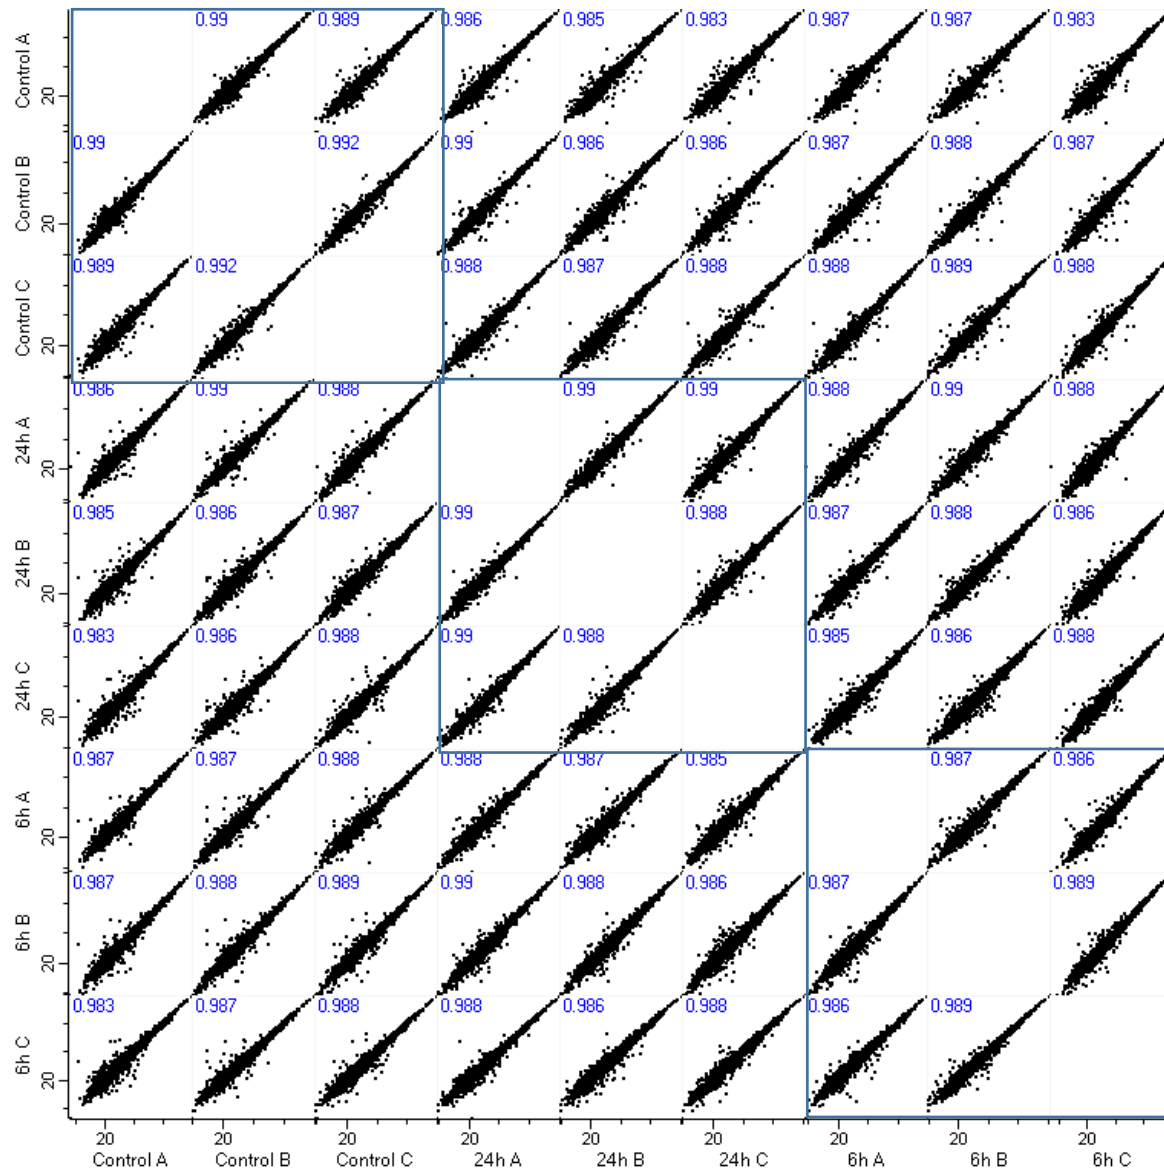

| Name      | Contro | Contro | Contro | 24h A | 24h B | 24h C | 6h A  | 6h B  | 6h C  |
|-----------|--------|--------|--------|-------|-------|-------|-------|-------|-------|
| Control A | 1      | 0.99   | 0.989  | 0.986 | 0.985 | 0.983 | 0.987 | 0.987 | 0.983 |
| Control B | 0.99   | 1      | 0.992  | 0.99  | 0.986 | 0.986 | 0.987 | 0.988 | 0.987 |
| Control C | 0.989  | 0.992  | 1      | 0.988 | 0.987 | 0.988 | 0.988 | 0.989 | 0.988 |
| 24h A     | 0.986  | 0.99   | 0.988  | 1     | 0.99  | 0.99  | 0.988 | 0.99  | 0.988 |
| 24h B     | 0.985  | 0.986  | 0.987  | 0.99  | 1     | 0.988 | 0.987 | 0.988 | 0.986 |
| 24h C     | 0.983  | 0.986  | 0.988  | 0.99  | 0.988 | 1     | 0.985 | 0.986 | 0.988 |
| 6h A      | 0.987  | 0.987  | 0.988  | 0.988 | 0.987 | 0.985 | 1     | 0.987 | 0.986 |
| 6h B      | 0.987  | 0.988  | 0.989  | 0.99  | 0.988 | 0.986 | 0.987 | 1     | 0.989 |
| 6h C      | 0.983  | 0.987  | 0.988  | 0.988 | 0.986 | 0.988 | 0.986 | 0.989 | 1     |

Pearson coefficients for pairwise comparisons

**Supplementary Figure 2:** Box-plots of MS intensity data (LFQ intensity values after log2 transformation) obtained from replicate experiments, in the 3 biological conditions (Control, IL33 stimulation 6h, IL33 stimulation 24h), for all proteins showing significant expression changes in either 24h versus control or 6h versus control comparisons.

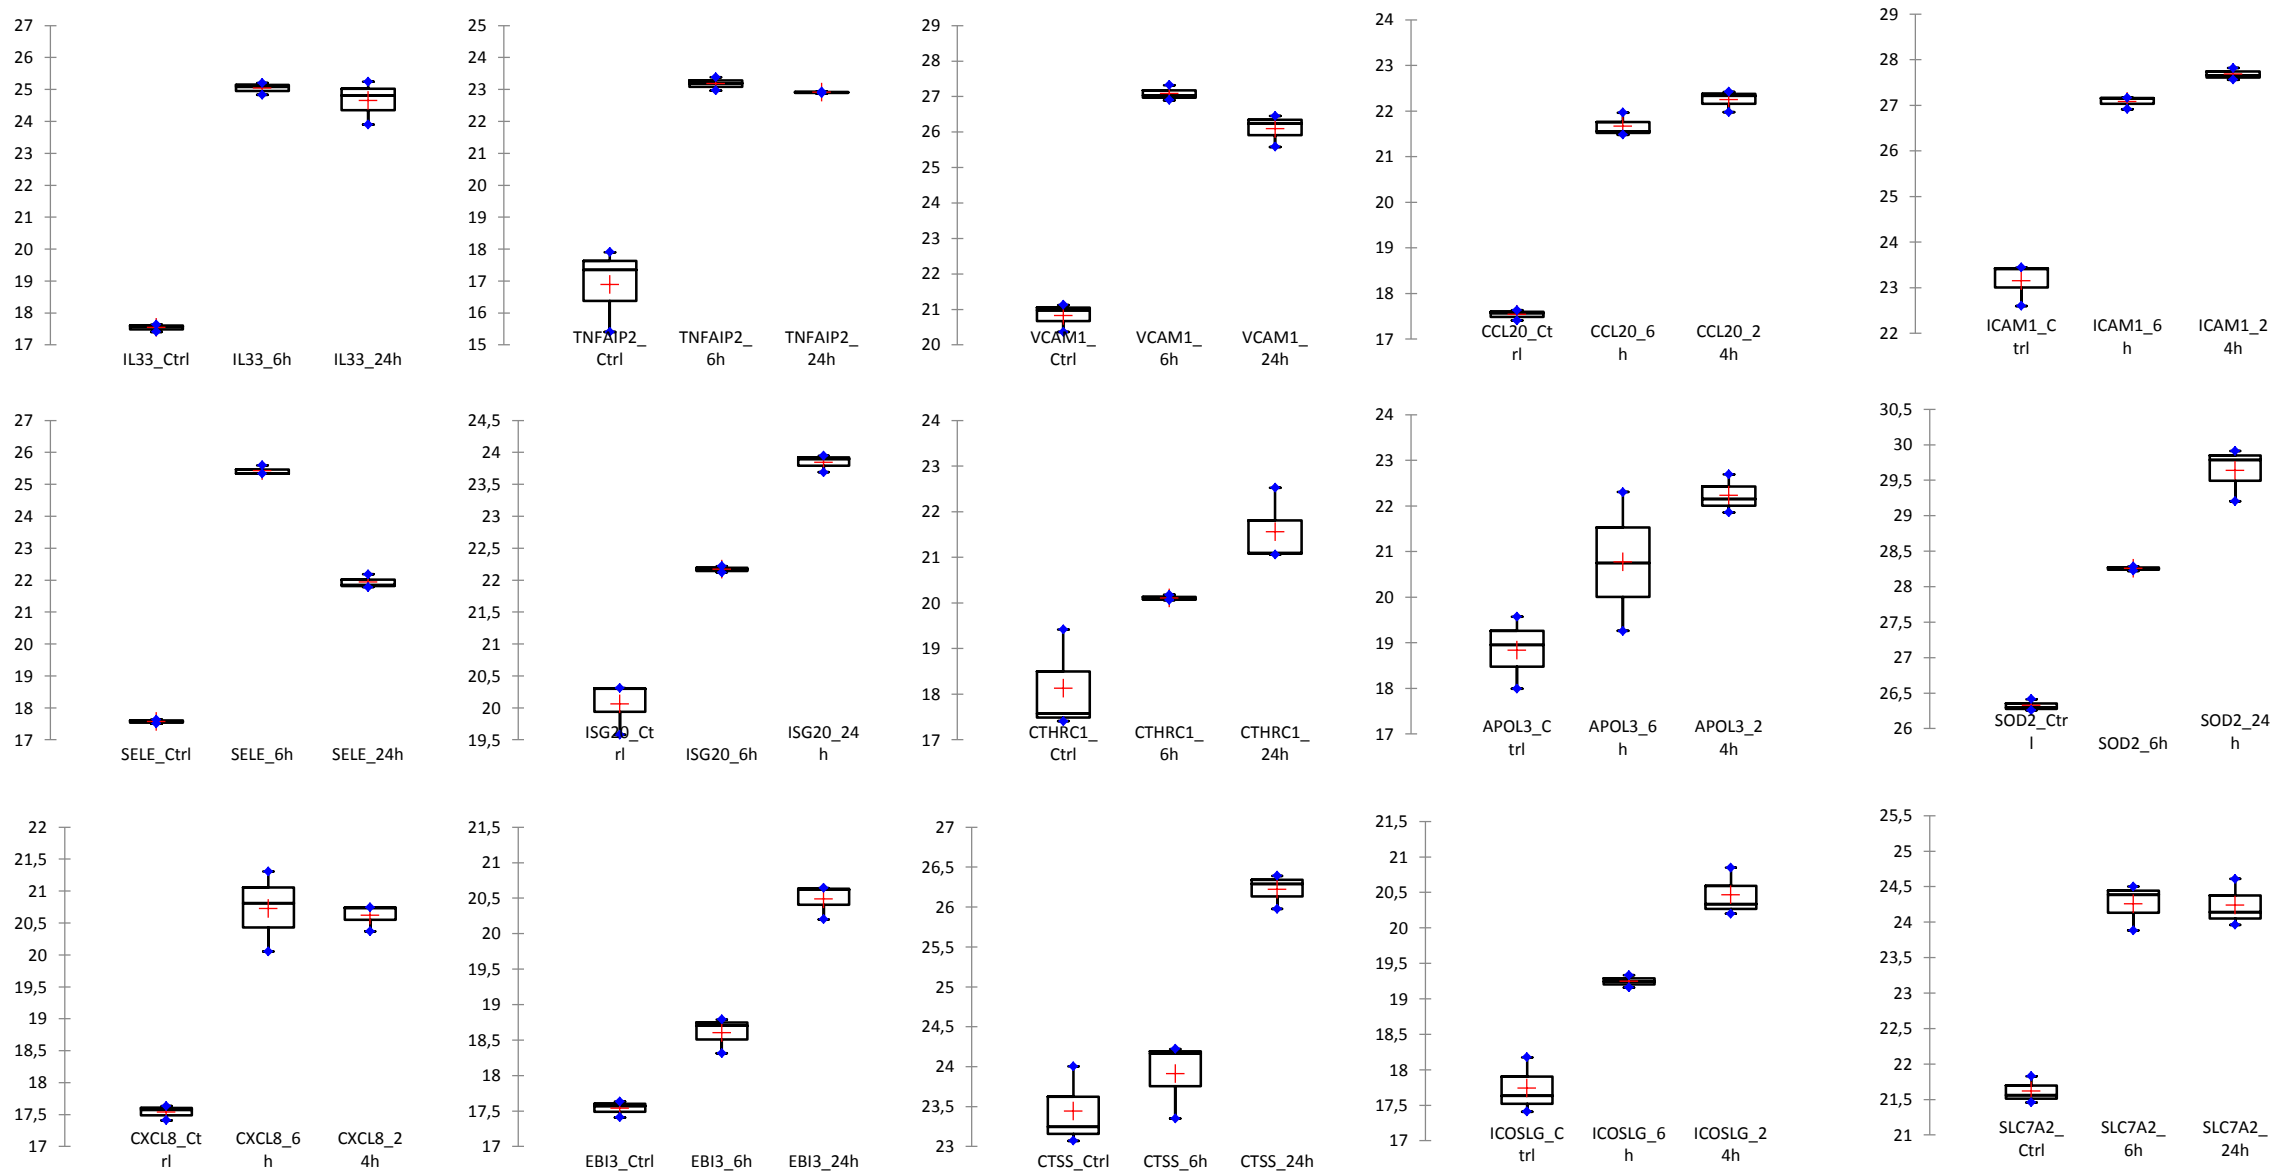

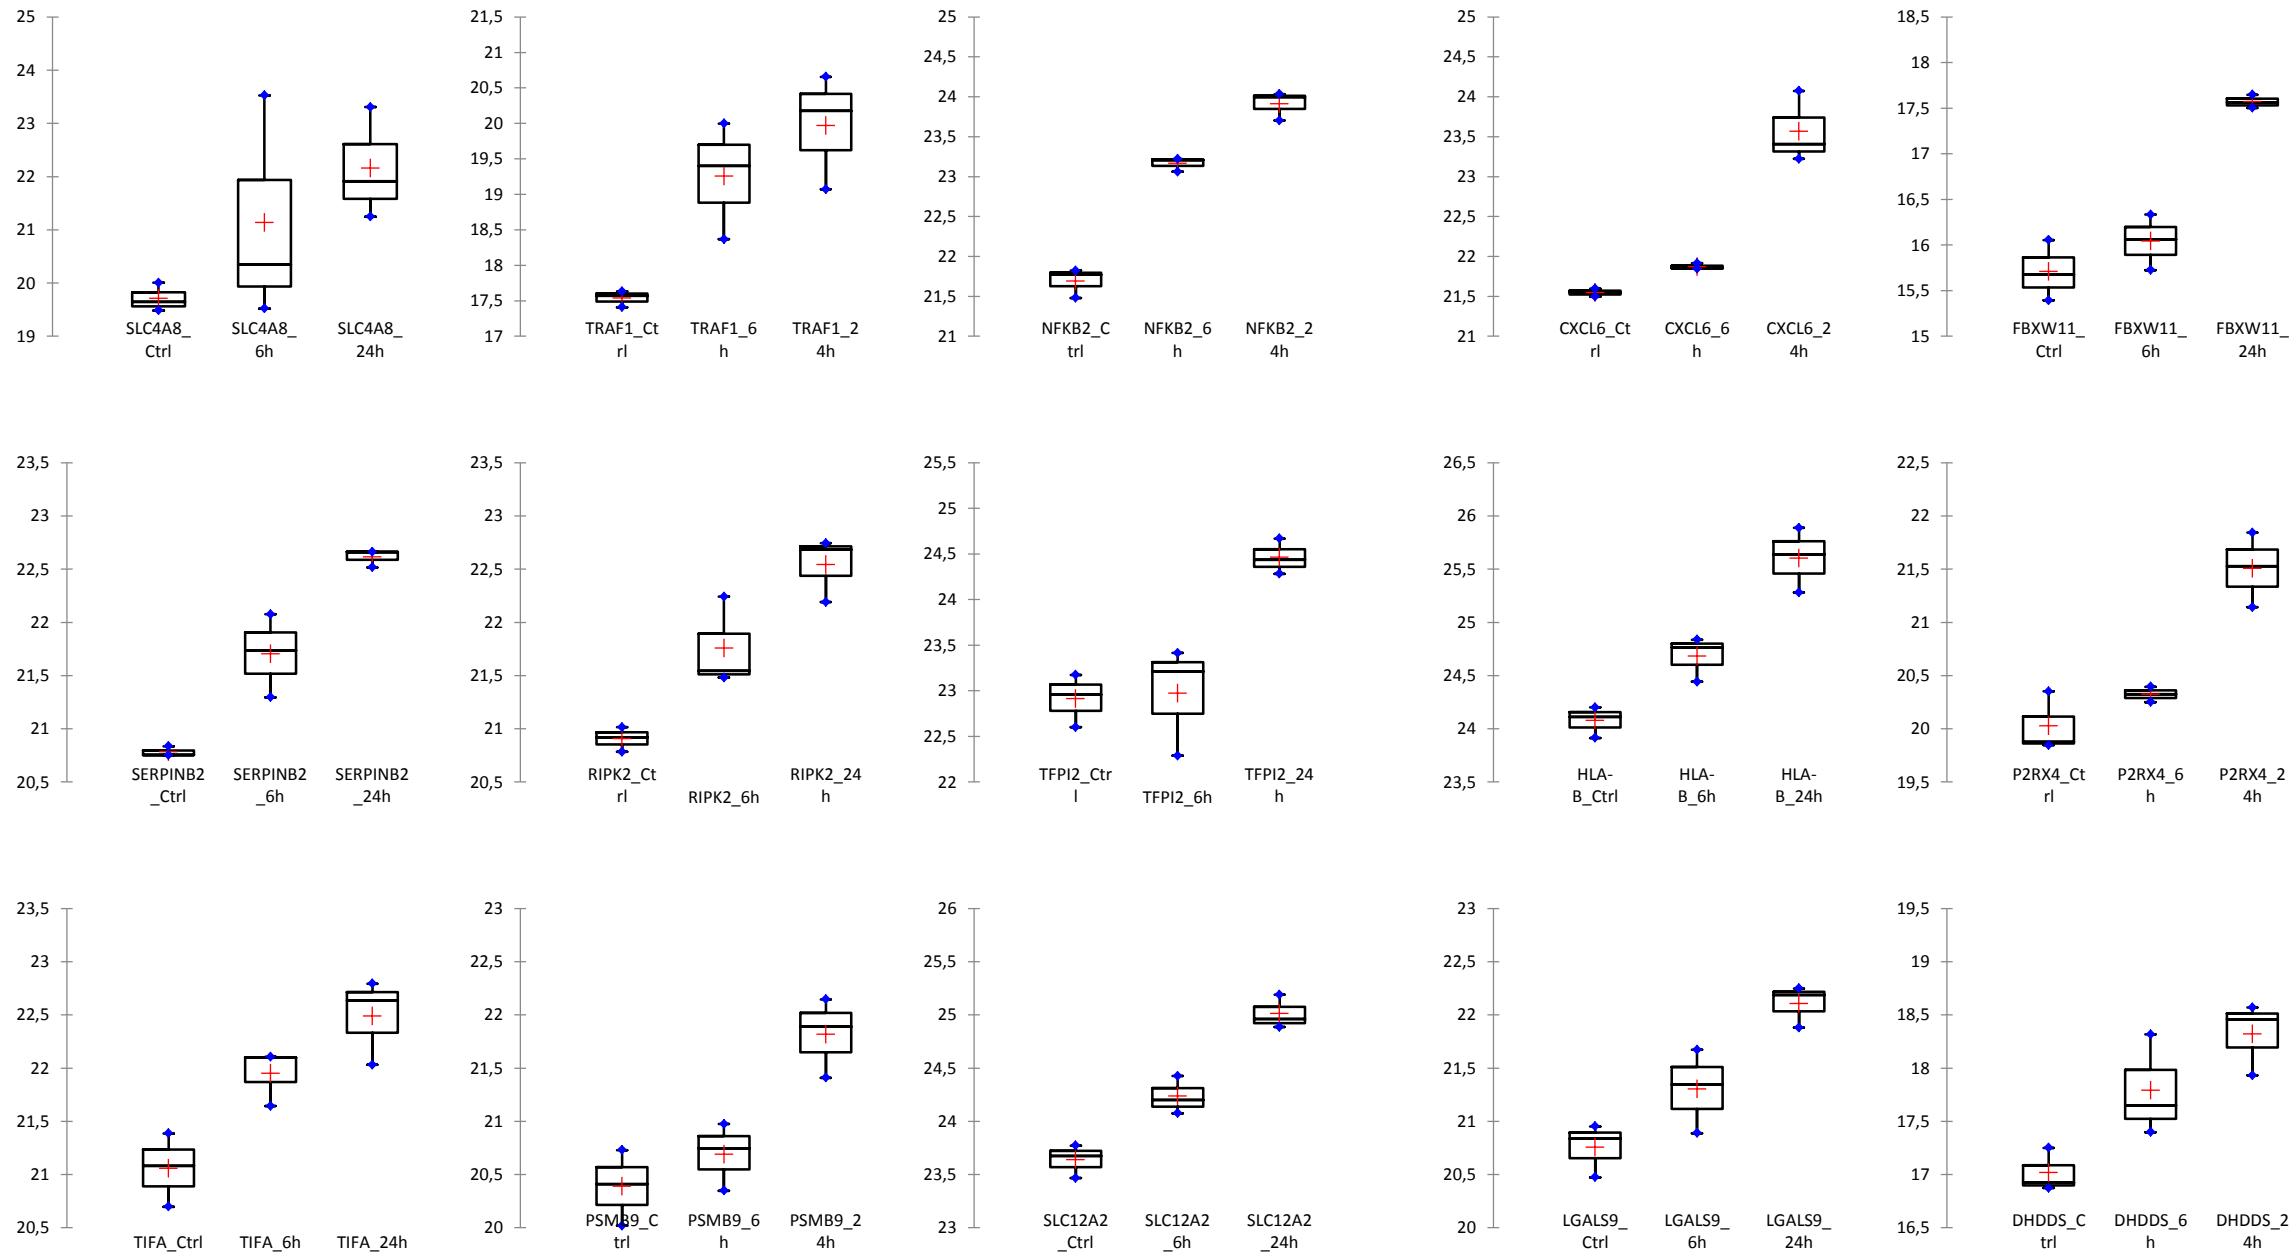

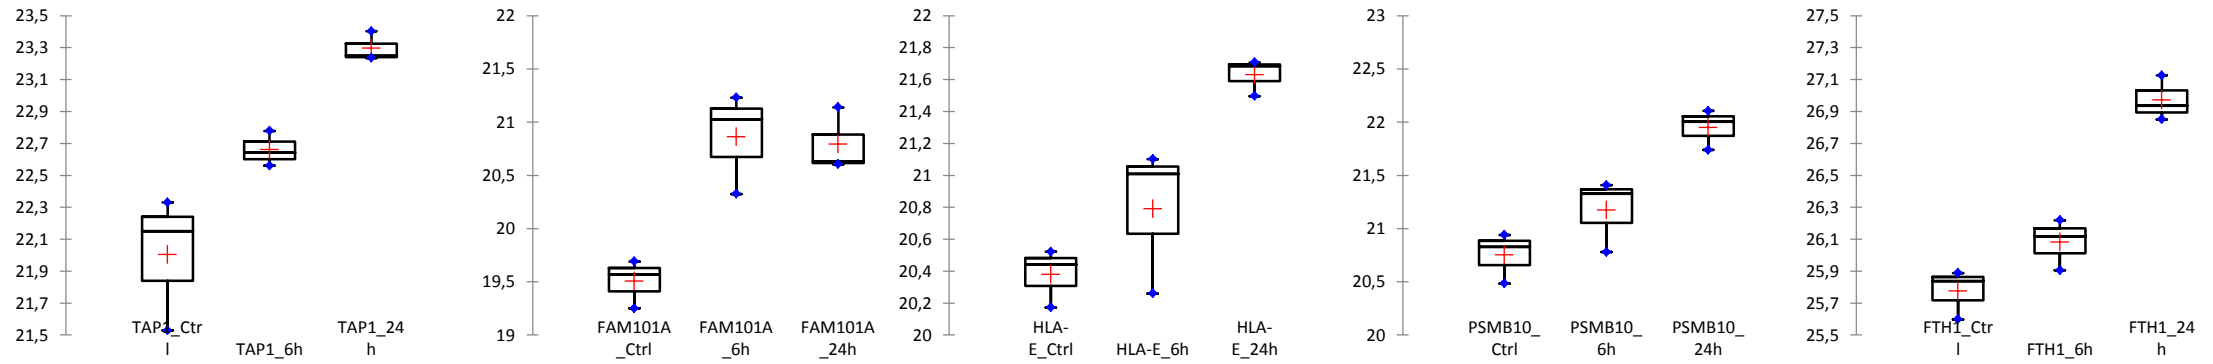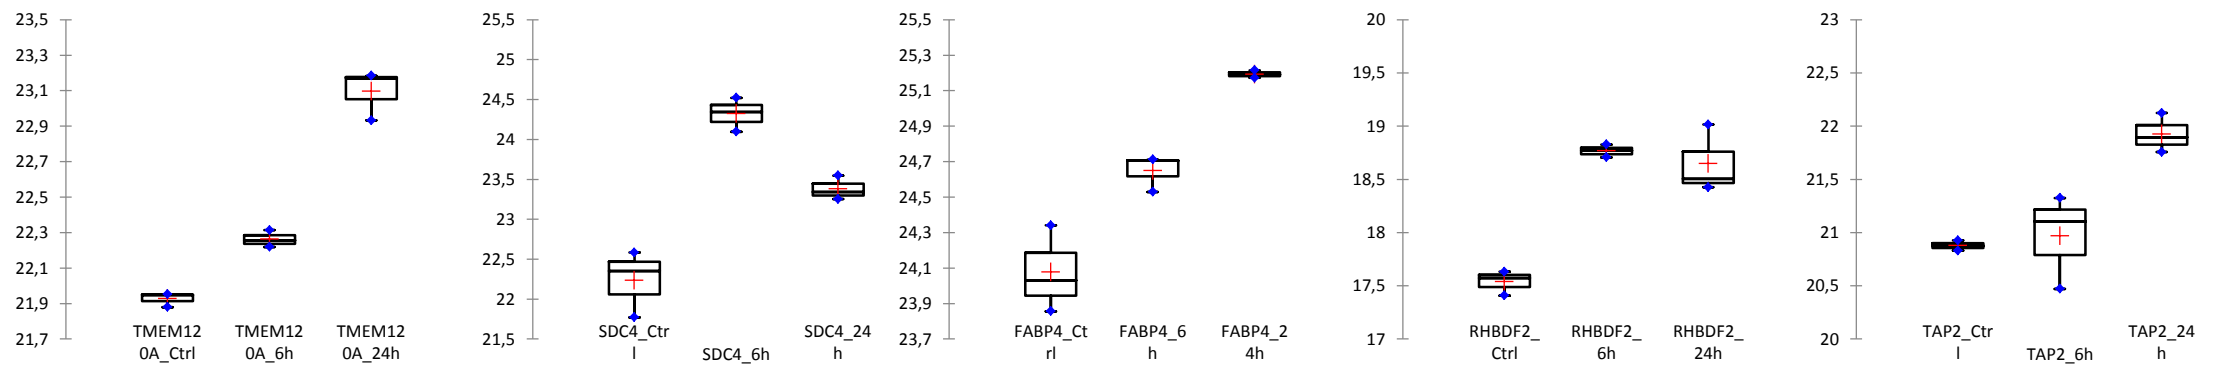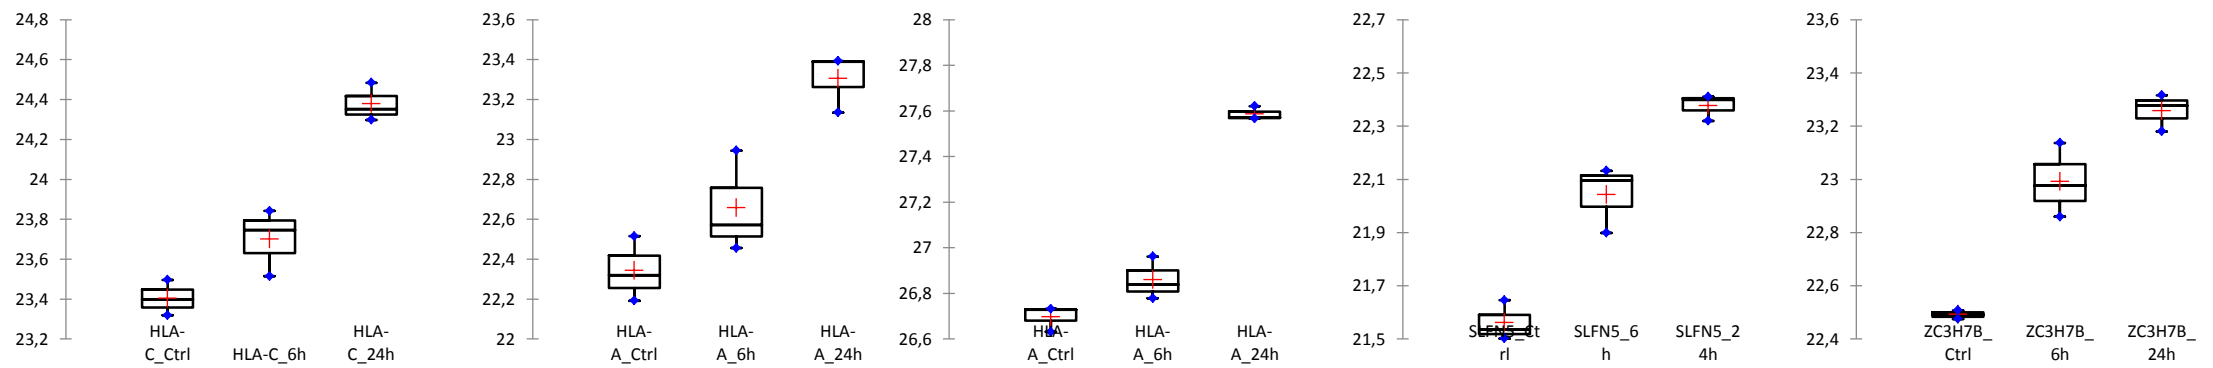

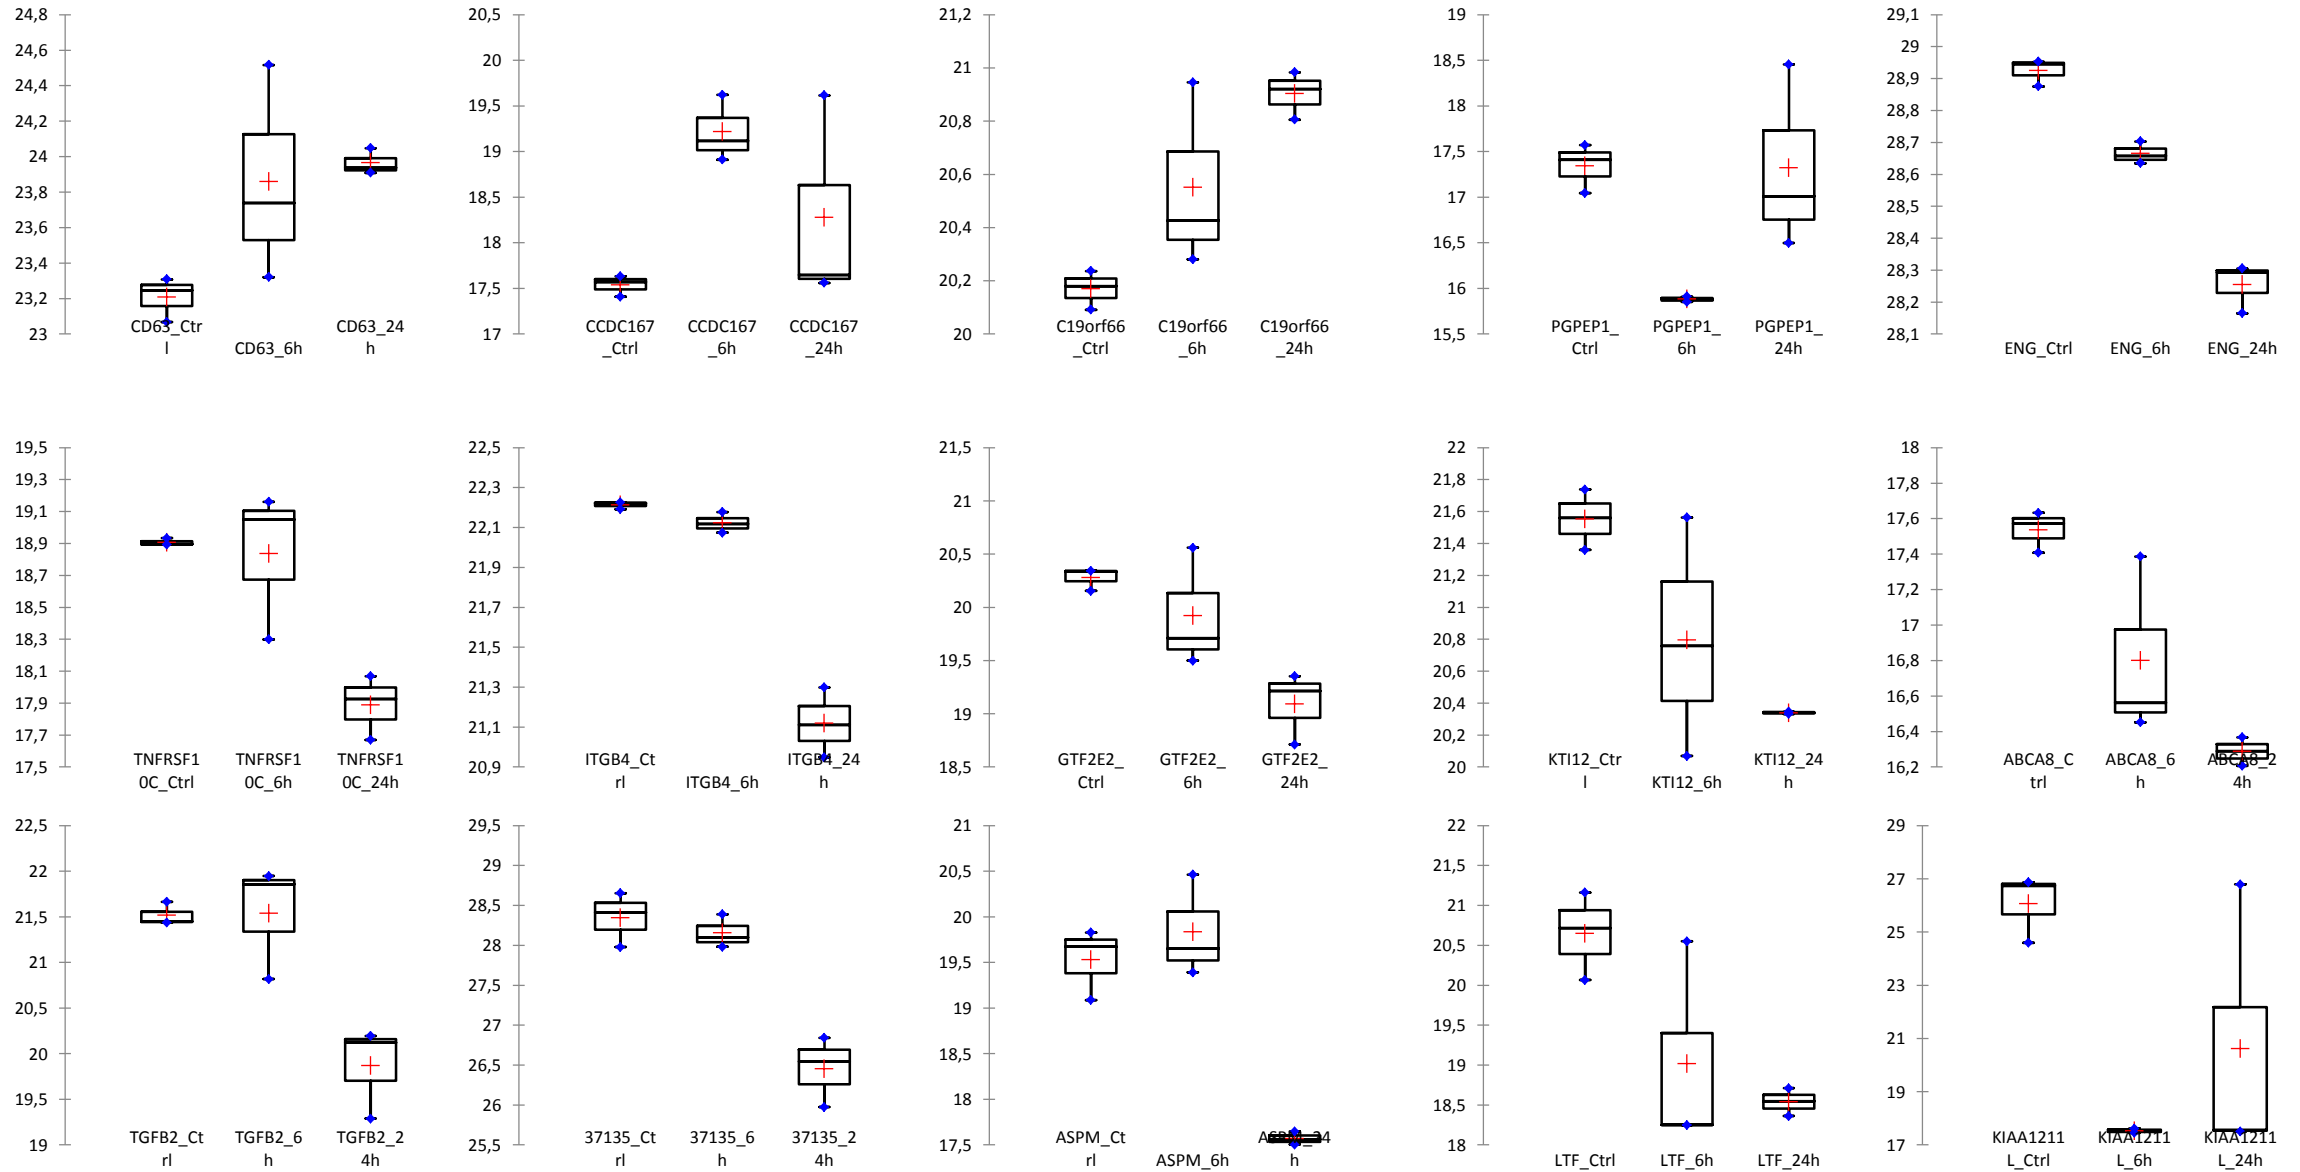

Supplement: srep34255-s1.pdf [file srep34255-s1.pdf]
